# Supplementary material for: Transcriptional Responses of Beauveria bassiana Blastospores Cultured Under Varying Glucose Concentrations
Source: Front Cell Infect Microbiol. 2021 Mar 24;11:644372. doi: 10.3389/fcimb.2021.644372 (PMC8024584; doi:10.3389/fcimb.2021.644372)
Supplement: Supplementary Table 2 — Enriched Gene Ontology (GO), terms in Beauveria bassiana blastospores (between 20% and 10% within each culture day, and between culture days within each glucose concentration) resulted from Gene set enrichment analysis. [file Table_2.xlsx]

## Sheet: D1 20vs10
Enriched Gene ontology (GO) terms in 20% of glucose
NAME	FDR q-val	SIZE
GO:0006886	0	48		Biological process			Celular component			Molecular function
GO:0005525	0	94
GO:0003924	0	63		GO:0006457	protein folding		GO:0000502	proteasome complex		GO:0000981	RNA polymerase II transcription factor activity, sequence-specific DNA binding
GO:0005634	0	474		GO:0016192	vesicle-mediated transport		GO:0005622	intracellular		GO:0008137	NADH dehydrogenase (ubiquinone) activity
GO:0022857	0.00246128	113		GO:0006511	ubiquitin-dependent protein catabolic process		GO:0005874	microtubule		GO:0008536	Ran GTPase binding
GO:0008536	0.00205107	10		GO:0051301	cell division		GO:0005737	cytoplasm		GO:0015078	hydrogen ion transmembrane transporter activity
GO:0008270	0.00208688	346		GO:0035556	intracellular signal transduction		GO:0005681	spliceosomal complex		GO:0036459	thiol-dependent ubiquitinyl hydrolase activity
GO:0016758	0.0021258	13		GO:0007165	signal transduction		GO:0000139	Golgi membrane		GO:0016758	transferase activity, transferring hexosyl groups
GO:0003677	0.00371346	304		GO:0006396	RNA processing		GO:0005634	nucleus		GO:0003743	translation initiation factor activity
GO:0006351	0.00405377	206		GO:0006633	fatty acid biosynthetic process		GO:0030529	intracellular ribonucleoprotein complex		GO:0016740	transferase activity
GO:0035556	0.00460004	13		GO:0015991	ATP hydrolysis coupled proton transport					GO:0005525	GTP binding
GO:0004674	0.00450052	38		GO:0006486	protein glycosylation					GO:0005509	calcium ion binding
GO:0051082	0.0113162	24		GO:0000398	mRNA splicing, via spliceosome					GO:0003676	nucleic acid binding
GO:0004721	0.0111108	10		GO:0015031	protein transport					GO:0004721	phosphoprotein phosphatase activity
GO:0036459	0.0239966	10		GO:0006886	intracellular protein transport					GO:0003924	GTPase activity
GO:0000139	0.0251792	15		GO:0055085	transmembrane transport					GO:0003899	DNA-directed 5'-3' RNA polymerase activity
GO:0008643	0.0268804	18		GO:0016579	protein deubiquitination					GO:0003677	DNA binding
GO:0016579	0.0288498	13		GO:0006351	transcription, DNA-templated					GO:0000287	magnesium ion binding
GO:0006511	0.0290867	32		GO:0009116	nucleoside metabolic process					GO:0008270	zinc ion binding
GO:0005622	0.0320286	95		GO:0007264	small GTPase mediated signal transduction					GO:0051082	unfolded protein binding
GO:0016192	0.0313835	36		GO:0006506	GPI anchor biosynthetic process					GO:0004672	protein kinase activity
GO:0006633	0.0309972	12		GO:0008643	carbohydrate transport					GO:0004674	protein serine/threonine kinase activity
GO:0006486	0.0381817	13		GO:0006865	amino acid transport					GO:0004177	aminopeptidase activity
GO:0000981	0.0426762	177								GO:0042626	ATPase activity, coupled to transmembrane movement of substances
GO:0003899	0.0456941	31								GO:0004519	endonuclease activity
GO:0006506	0.0443112	11								GO:0022857	transmembrane transporter activity
GO:0042626	0.0428378	65
GO:0004519	0.0420903	20
GO:0055085	0.0446116	242
GO:0005737	0.0460165	181
GO:0005509	0.0583538	41
GO:0000502	0.0612191	14
GO:0006865	0.0677065	12
GO:0004672	0.0666721	107
GO:0007165	0.0687689	28
GO:0008137	0.0894076	15
GO:0005874	0.0873735	18
GO:0006457	0.0914486	33
GO:0003743	0.0905411	47
GO:0004177	0.110047	15
GO:0015991	0.107981	14
GO:0000287	0.128106	40
GO:0007264	0.151237	13
GO:0005681	0.170974	13
GO:0003676	0.173836	177
GO:0015078	0.190745	14
GO:0009116	0.187229	17
GO:0006396	0.185541	25
GO:0051301	0.190144	19
GO:0016740	0.190173	93
GO:0030529	0.220676	20
GO:0015031	0.216493	34
GO:0000398	0.243696	19
Enriched Gene ontology (GO) terms in 10% of glucose
NAME	FDR q-val	SIZE		Biological process			Celular component			Molecular function
GO:0008080	0	44
GO:0016491	0.00648978	216		GO:0006979	response to oxidative stress					GO:0008080	N-acetyltransferase activity
GO:0004806	0.0250855	11		GO:0008152	metabolic process					GO:0050660	flavin adenine dinucleotide binding
GO:0016627	0.0921522	15								GO:0050661	NADP binding
GO:0006979	0.115086	13								GO:0004806	triglyceride lipase activity
GO:0050660	0.132541	81								GO:0016627	oxidoreductase activity, acting on the CH-CH group of donors
GO:0004499	0.117261	17								GO:0016829	lyase activity
GO:0050661	0.182999	30								GO:0016491	oxidoreductase activity
GO:0008152	0.165408	161								GO:0046983	protein dimerization activity
GO:0016829	0.180258	25								GO:0004499	N,N-dimethylaniline monooxygenase activity
GO:0046983	0.204775	22								GO:0048037	cofactor binding
GO:0048037	0.198625	11

## Sheet: D2 20vs10
Enriched Gene ontology (GO) terms in 20% of glucose
NAME	FDR q-val	SIZE		Biological process			Celular component			Molecular function
GO:0003735	0	106		GO:0006281	DNA repair		GO:0005840	ribosome		GO:0003735	structural constituent of ribosome
GO:0005840	0	111		GO:0006298	mismatch repair		GO:0005737	cytoplasm		GO:0003755	peptidyl-prolyl cis-trans isomerase activity
GO:0006412	0	106		GO:0006886	intracellular protein transport		GO:0016592	mediator complex		GO:0008536	Ran GTPase binding
GO:0005737	0	174		GO:0006338	chromatin remodeling		GO:0005874	microtubule		GO:0004298	threonine-type endopeptidase activity
GO:0003755	0.00437503	19		GO:0005975	carbohydrate metabolic process		GO:0005681	spliceosomal complex		GO:0016829	lyase activity
GO:0006281	0.0101254	50		GO:0006511	ubiquitin-dependent protein catabolic process		GO:0015935	small ribosomal subunit		GO:0016620	oxidoreductase activity, acting on the aldehyde or oxo group of donors, NAD or NADP as acceptor
GO:0006886	0.0110891	48		GO:0000398	mRNA splicing, via spliceosome					GO:0051539	4 iron, 4 sulfur cluster binding
GO:0006260	0.0269392	33		GO:0006412	translation					GO:0003743	translation initiation factor activity
GO:0008536	0.0546492	10		GO:0006351	transcription, DNA-templated					GO:0008270	zinc ion binding
GO:0003677	0.0762976	298		GO:0006260	DNA replication					GO:0010181	FMN binding
GO:0046872	0.0845073	239		GO:0006310	DNA recombination					GO:0016887	ATPase activity
GO:0051539	0.100627	19								GO:0043565	sequence-specific DNA binding
GO:0003743	0.101583	47								GO:0004553	hydrolase activity, hydrolyzing O-glycosyl compounds
GO:0008270	0.106436	341								GO:0003677	DNA binding
GO:0010181	0.107866	17								GO:0046982	protein heterodimerization activity
GO:0005874	0.109078	18								GO:0046872	metal ion binding
GO:0006511	0.118703	32
GO:0006310	0.138511	11
GO:0043565	0.146235	25
GO:0016592	0.157458	11
GO:0015935	0.169227	10
GO:0006351	0.172785	203
GO:0046982	0.175169	26
GO:0004298	0.178773	15
GO:0005681	0.186409	13
GO:0006338	0.192492	13
GO:0016887	0.234711	22
GO:0006298	0.237842	10
GO:0016829	0.239502	26
GO:0004553	0.239968	63
GO:0000398	0.242949	19
GO:0016620	0.248209	14
GO:0005975	0.248268	117
Enriched Gene ontology (GO) terms in 10% of glucose
NAME	FDR q-val	SIZE		Biological process			Celular component			Molecular function
GO:0005739	0.0209491	68		GO:0006486	protein glycosylation		GO:0005739	mitochondrion		GO:0016614	oxidoreductase activity, acting on CH-OH group of donors
GO:0007165	0.01602	28		GO:0055085	transmembrane transport		GO:0005789	endoplasmic reticulum membrane		GO:0020037	heme binding
GO:0055085	0.0328865	235		GO:0007165	signal transduction		GO:0005783	endoplasmic reticulum		GO:0004806	triglyceride lipase activity
GO:0005789	0.0690584	44		GO:0006633	fatty acid biosynthetic process					GO:0050660	flavin adenine dinucleotide binding
GO:0020037	0.0633825	84		GO:0006629	lipid metabolic process					GO:0005506	iron ion binding
GO:0050660	0.0845602	75								GO:0031177	phosphopantetheine binding
GO:0006486	0.091731	13
GO:0004806	0.225064	12
GO:0005783	0.209682	11
GO:0006633	0.20023	10
GO:0031177	0.182095	20
GO:0016614	0.169967	33
GO:0005506	0.222857	85
GO:0006629	0.239259	34

## Sheet: D3 20vs10
Enriched Gene ontology (GO) terms in 20% of glucose
NAME	FDR q-val	SIZE	Biological process			Celular component			Molecular function
GO:0003735	0	106
GO:0006412	0	106	GO:0006412	translation		GO:0005840	ribosome		GO:0003735	structural constituent of ribosome
GO:0005840	0	110	GO:0008152	metabolic process		GO:0005737	cytoplasm		GO:0003755	peptidyl-prolyl cis-trans isomerase activity
GO:0030246	0.00703	15	GO:0006520	cellular amino acid metabolic process		GO:0015935	small ribosomal subunit		GO:0003824	catalytic activity
GO:0016491	0.00299691	215							GO:0030246	carbohydrate binding
GO:0005737	0.0245036	171							GO:0016829	lyase activity
GO:0008152	0.0272984	157							GO:0008237	metallopeptidase activity
GO:0016829	0.0565641	26							GO:0016614	oxidoreductase activity, acting on CH-OH group of donors
GO:0003755	0.0565028	19							GO:0016853	isomerase activity
GO:0015935	0.0602959	10							GO:0016491	oxidoreductase activity
GO:0016787	0.0788711	135							GO:0030170	pyridoxal phosphate binding
GO:0030170	0.11003	52							GO:0016787	hydrolase activity
GO:0050660	0.119707	76							GO:0016620	oxidoreductase activity, acting on the aldehyde or oxo group of donors, NAD or NADP as acceptor
GO:0008237	0.137956	24							GO:0010181	FMN binding
GO:0016853	0.131283	16							GO:0004298	threonine-type endopeptidase activity
GO:0016614	0.14079	33							GO:0050660	flavin adenine dinucleotide binding
GO:0004298	0.1483	15							GO:0071949	FAD binding
GO:0006520	0.142765	12
GO:0010181	0.160512	16
GO:0003824	0.163153	142
GO:0016620	0.158444	13
GO:0071949	0.246436	27
Enriched Gene ontology (GO) terms in 10% of glucose
NAME	FDR q-val	SIZE	Biological process			Celular component			Molecular function
GO:0006260	0.0199061	33	GO:0006260	DNA replication		GO:0005622	intracellular		GO:0004519	endonuclease activity
GO:0008137	0.0257473	14	GO:0007018	microtubule-based movement		GO:0005634	nucleus		GO:0008017	microtubule binding
GO:0004519	0.0249296	20	GO:0007165	signal transduction					GO:0008137	NADH dehydrogenase (ubiquinone) activity
GO:0004386	0.0347223	57	GO:0006099	tricarboxylic acid cycle					GO:0035091	phosphatidylinositol binding
GO:0003677	0.0311485	297	GO:0006486	protein glycosylation					GO:0003677	DNA binding
GO:0007165	0.0284385	28	GO:0006310	DNA recombination					GO:0004252	serine-type endopeptidase activity
GO:0008017	0.055489	18							GO:0004386	helicase activity
GO:0005622	0.0962673	96							GO:0008536	Ran GTPase binding
GO:0003777	0.0965218	18							GO:0003777	microtubule motor activity
GO:0007018	0.0942243	16
GO:0006486	0.10092	13
GO:0004252	0.129954	50
GO:0005634	0.123325	476
GO:0008536	0.121421	10
GO:0006099	0.150255	20
GO:0035091	0.195844	13
GO:0006310	0.197173	12

## Sheet:  Common GO_BP
		Commom enriched GO term between day 1 and day 2
		Commom enriched GO term between day 2 and day 3
		D1			D2			D3
		Biological process			Biological process			Biological process
				SIZE			SIZE			SIZE
	Enriched in 20% glucose	GO:0006457	protein folding	33	GO:0006281	DNA repair	50	GO:0006412	translation	106
		GO:0016192	vesicle-mediated transport	36	GO:0006298	mismatch repair	10	GO:0008152	metabolic process	157
		GO:0006511	ubiquitin-dependent protein catabolic process	32	GO:0006886	intracellular protein transport	48	GO:0006520	cellular amino acid metabolic process	12
		GO:0051301	cell division	19	GO:0006338	chromatin remodeling	13
		GO:0035556	intracellular signal transduction	13	GO:0005975	carbohydrate metabolic process	117
		GO:0007165	signal transduction	28	GO:0006511	ubiquitin-dependent protein catabolic process	32
		GO:0006396	RNA processing	25	GO:0000398	mRNA splicing, via spliceosome	19
		GO:0006633	fatty acid biosynthetic process	12	GO:0006412	translation	106
		GO:0015991	ATP hydrolysis coupled proton transport	14	GO:0006351	transcription, DNA-templated	203
		GO:0006486	protein glycosylation	13	GO:0006260	DNA replication	33
		GO:0000398	mRNA splicing, via spliceosome	19	GO:0006310	DNA recombination	11
		GO:0015031	protein transport	34
		GO:0006886	intracellular protein transport	48
		GO:0055085	transmembrane transport	242
		GO:0016579	protein deubiquitination	13
		GO:0006351	transcription, DNA-templated	206
		GO:0009116	nucleoside metabolic process	17
		GO:0007264	small GTPase mediated signal transduction	13
		GO:0006506	GPI anchor biosynthetic process	11
		GO:0008643	carbohydrate transport	18
		GO:0006865	amino acid transport	12
		Biological process			Biological process			Biological process
				SIZE			SIZE			SIZE
	Enriched in 10% glucose	GO:0006979	response to oxidative stress	13	GO:0006486	protein glycosylation	13	GO:0006260	DNA replication	33
		GO:0008152	metabolic process	161	GO:0055085	transmembrane transport	235	GO:0007018	microtubule-based movement	16
					GO:0007165	signal transduction	28	GO:0007165	signal transduction	28
					GO:0006633	fatty acid biosynthetic process	10	GO:0006099	tricarboxylic acid cycle	20
					GO:0006629	lipid metabolic process	34	GO:0006486	protein glycosylation	13
								GO:0006310	DNA recombination	12

## Sheet: 20_D2vsD1
Enriched Gene ontology (GO) terms in 20% of glucose at day 2 compared to day 1
NAME	SIZE
GO:0006979	13			Biological process			Celular component			Molecular function
GO:0008152	160			GO:0006979	response to oxidative stress		GO:0005886	plasma membrane		GO:0000981	RNA polymerase II transcription factor activity, sequence-specific DNA binding
GO:0009058	35			GO:0008152	metabolic process					GO:0003824	catalytic activity
GO:0015991	13			GO:0009058	biosynthetic process					GO:0008061	chitin binding
GO:0043386	14			GO:0015991	ATP hydrolysis coupled proton transport					GO:0009055	electron carrier activity
GO:0006629	34			GO:0043386	mycotoxin biosynthetic process					GO:0015078	hydrogen ion transmembrane transporter activity
GO:0006096	12			GO:0006629	lipid metabolic process					GO:0016747	transferase activity, transferring acyl groups other than amino-acyl groups
GO:0008610	17			GO:0006096	glycolytic process					GO:0090729	toxin activity
GO:0055085	245			GO:0008610	lipid biosynthetic process					GO:0004252	serine-type endopeptidase activity
GO:0006520	13			GO:0055085	transmembrane transport					GO:0004497	monooxygenase activity
GO:0005886	14			GO:0006520	cellular amino acid metabolic process					GO:0016874	ligase activity
GO:0005886	14									GO:0051537	2 iron, 2 sulfur cluster binding
GO:0000981	177									GO:0031177	phosphopantetheine binding
GO:0003824	140									GO:0020037	heme binding
GO:0008061	14									GO:0016787	hydrolase activity
GO:0009055	17									GO:0016491	oxidoreductase activity
GO:0015078	12									GO:0016740	transferase activity
GO:0016747	20									GO:0005507	copper ion binding
GO:0090729	12									GO:0050660	flavin adenine dinucleotide binding
GO:0004252	52									GO:0004553	hydrolase activity, hydrolyzing O-glycosyl compounds
GO:0004497	64									GO:0016810	hydrolase activity, acting on carbon-nitrogen (but not peptide) bonds
GO:0016874	50									GO:0004499	N,N-dimethylaniline monooxygenase activity
GO:0051537	16									GO:0016627	oxidoreductase activity, acting on the CH-CH group of donors
GO:0031177	19									GO:0016705	oxidoreductase activity, acting on paired donors, with incorporation or reduction of molecular oxygen
GO:0020037	87									GO:0016614	oxidoreductase activity, acting on CH-OH group of donors
GO:0016787	138									GO:0005506	iron ion binding
GO:0016491	48									GO:0071949	FAD binding
GO:0016740	89
GO:0005507	22
GO:0050660	79
GO:0004553	65
GO:0016810	16
GO:0004499	18
GO:0016627	15
GO:0016705	55
GO:0016614	35
GO:0005506	86
GO:0071949	27

## Sheet: 20_D3vsD2
Enriched Gene ontology (GO) terms in 20% of glucose at day 3 compared to day 2
NAME	SIZE			Biological process			Celular component			Molecular function
GO:0006364	22			GO:0006364	rRNA processing		GO:0005730	nucleolus		GO:0000981	RNA polymerase II transcription factor activity, sequence-specific DNA binding
GO:0055085	245			GO:0055085	transmembrane transport		GO:0005634	nucleus		GO:0004386	helicase activity
GO:0006351	204			GO:0006351	transcription, DNA-templated					GO:0008270	zinc ion binding
GO:0005730	17									GO:0016831	carboxy-lyase activity
GO:0005634	475									GO:0000155	phosphorelay sensor kinase activity
GO:0000981	177									GO:0003676	nucleic acid binding
GO:0004386	59									GO:0003677	DNA binding
GO:0008270	342									GO:0003899	DNA-directed 5'-3' RNA polymerase activity
GO:0016831	12
GO:0000155	11
GO:0003676	178
GO:0003677	297
GO:0003899	30

## Sheet: 10_D2vsD1
Enriched Gene ontology (GO) terms in 10% of glucose at day 2 compared to day 1
NAME	SIZE		Biological process			Celular component			Molecular function
GO:0005975	120		GO:0005975	carbohydrate metabolic process		GO:0005739	mitochondrion		GO:0000981	RNA polymerase II transcription factor activity, sequence-specific DNA binding
GO:0006979	13		GO:0006979	response to oxidative stress		GO:0005618	cell wall		GO:0003824	catalytic activity
GO:0015991	14		GO:0015991	ATP hydrolysis coupled proton transport		GO:0005743	mitochondrial inner membrane		GO:0008061	chitin binding
GO:0043386	11		GO:0043386	mycotoxin biosynthetic process		GO:0005886	plasma membrane		GO:0015078	hydrogen ion transmembrane transporter activity
GO:0006486	13		GO:0006486	protein glycosylation					GO:0004129	cytochrome-c oxidase activity
GO:0006629	34		GO:0006629	lipid metabolic process					GO:0016758	transferase activity, transferring hexosyl groups
GO:0008610	17		GO:0008610	lipid biosynthetic process					GO:0090729	toxin activity
GO:0007264	13		GO:0007264	small GTPase mediated signal transduction					GO:0004806	triglyceride lipase activity
GO:0007165	28		GO:0007165	signal transduction					GO:0004497	monooxygenase activity
GO:0005739	69								GO:0016787	hydrolase activity
GO:0005618	14								GO:0020037	heme binding
GO:0005743	30								GO:0005507	copper ion binding
GO:0005886	18								GO:0016491	oxidoreductase activity
GO:0000981	178								GO:0031177	phosphopantetheine binding
GO:0003824	144								GO:0004252	serine-type endopeptidase activity
GO:0008061	14								GO:0050660	flavin adenine dinucleotide binding
GO:0015078	14								GO:0004553	hydrolase activity, hydrolyzing O-glycosyl compounds
GO:0004129	10								GO:0000155	phosphorelay sensor kinase activity
GO:0016758	14								GO:0004499	N,N-dimethylaniline monooxygenase activity
GO:0090729	13								GO:0016705	oxidoreductase activity, acting on paired donors, with incorporation or reduction of molecular oxygen
GO:0004806	11								GO:0016614	oxidoreductase activity, acting on CH-OH group of donors
GO:0004497	65								GO:0071949	FAD binding
GO:0016787	138
GO:0020037	88
GO:0005507	22
GO:0016491	225
GO:0031177	19
GO:0004252	53
GO:0050660	80
GO:0004553	62
GO:0000155	11
GO:0004499	17
GO:0016705	56
GO:0016614	34
GO:0071949	27

## Sheet: 10_D3vsD2 
Enriched Gene ontology (GO) terms in 10% of glucose at day 3 compared to day 2
NAME	SIZE		Biological process			Celular component			Molecular function
GO:0006351	205		GO:0006351	transcription, DNA-templated		GO:0005634	nucleus		GO:0003677	DNA binding
GO:0006281	54		GO:0006281	DNA repair		GO:0030529	ribonucleoprotein complex		GO:0008270	zinc ion binding
GO:0035556	13		GO:0035556	intracellular signal transduction		GO:0005622	intracellular anatomical structure		GO:0000981	DNA-binding transcription factor activity
GO:0006298	10		GO:0006298	mismatch repair		GO:0005730	nucleolus		GO:0004386	helicase activity
GO:0016579	13		GO:0016579	protein deubiquitination					GO:0003676	nucleic acid binding
GO:0006310	13		GO:0006310	DNA recombination					GO:0008536	Ran GTPase binding
GO:0006260	34		GO:0006260	DNA replication					GO:0016887	ATPase activity
GO:0006289	18		GO:0006289	nucleotide-excision repair					GO:0003743	translation initiation factor activity
GO:0042254	12		GO:0042254	ribosome biogenesis					GO:0043565	sequence-specific DNA binding
GO:0006364	23		GO:0006364	rRNA processing					GO:0036459	thiol-dependent ubiquitin-specific protease activity
GO:0001522	11		GO:0001522	pseudouridine synthesis					GO:0008017	microtubule binding
GO:0007165	28		GO:0007165	signal transduction					GO:0003684	damaged DNA binding
GO:0005634	475								GO:0004674	protein serine/threonine kinase activity
GO:0030529	20								GO:0003700	DNA-binding transcription factor activity
GO:0005622	96								GO:0000155	phosphorelay sensor kinase activity
GO:0005730	17								GO:0004672	protein kinase activity
GO:0003677	308								GO:0008168	methyltransferase activity
GO:0008270	347								GO:0003887	DNA-directed DNA polymerase activity
GO:0000981	178								GO:0003899	DNA-directed 5'-3' RNA polymerase activity
GO:0004386	59
GO:0003676	178
GO:0008536	10
GO:0016887	24
GO:0003743	47
GO:0043565	27
GO:0036459	10
GO:0008017	18
GO:0003684	15
GO:0004674	38
GO:0003700	55
GO:0000155	11
GO:0004672	108
GO:0008168	74
GO:0003887	15
GO:0003899	31
