# Supplementary material for: Transcriptional Responses of Beauveria bassiana Blastospores Cultured Under Varying Glucose Concentrations
Source: Front Cell Infect Microbiol. 2021 Mar 24;11:644372. doi: 10.3389/fcimb.2021.644372 (PMC8024584; doi:10.3389/fcimb.2021.644372)
Supplement: Supplementary Table 4 — Homologous (e-value < 0.0001 and sequence similarity > 80%) to 14 Hsp70 sequences, four MAPK sequences, and one sequence (Wsc1) obtained from Liu et al. (2017); Wang et al. (2020), and Tong et al. (2019), respectively, and 40 related-genes to osmotic stress in B. bassiana (Ortiz-Urquiza and Keyhani, 2016). [file Table_4.xlsx]

## Sheet: Selected_genes
		B. bassiana strain (reference)
Name	Reference	ARSEF 2860 gene	BB-D15-homologous
Heat shock 70 kDa protein	Wang et al. (2020)	BBA_05586_Ssa	BBAD15_g7647
Heat shock protein SSB1	Wang et al. (2020)	BBA_00257_Ssb	BBAD15_g2252
Protein cwh43	Wang et al. (2020)	BBA_01508_Ssc	BBAD15_g3781
78 kDa glucose-regulated protein	Wang et al. (2020)	BBA_03905_Kar	BBAD15_g9916
Heat shock protein Hsp88	Wang et al. (2020)	BBA_06847_Sse	BBAD15_g5290
Ribosome-associated complex subunit SSZ1	Wang et al. (2020)	BBA_02348_Ssz	BBAD15_g4682
Hypoxia up-regulated protein 1	Wang et al. (2020)	BBA_03608_Lhs1Hsp70f	BBAD15_g10598
Chaperone protein DnaK	Wang et al. (2020)	BBA_09451_Hsp70a	BBAD15_g11489
Pathogenesis-related protein 5	Wang et al. (2020)	BBA_067871_Hsp70b	BBAD15_g7356
Chaperone protein DnaK	Wang et al. (2020)	BBA_08628_Hsp70c	BBAD15_g6486
Heat shock 70 kDa protein 12A	Wang et al. (2020)	BBA_00997_Hsp70e	BBAD15_g1960
Heat shock 70 kDa protein 12A	Wang et al. (2020)	BBA_00941_Hsp70g	BBAD15_g1902
Heat shock 70 kDa protein 12B	Wang et al. (2020)	BBA_00796_Hsp70h	BBAD15_g4112
mitogen-activated protein kinase kinase kinase	Liu et al. (2017)	BBA_02280_Ste11	BBAD15_g9298
MAP kinase kinase kinase wis4	Liu et al. (2017)	BBA_00937_Ssk2_Ssk22	BBAD15_g1898
MAP kinase kinase PBS2	Liu et al. (2017)	BBA_02330_PBS	BBAD15_g4699
MAP kinase kinase kinase hog	Liu et al. (2017)	BBA_05209_Hog	BBAD15_g6467
WSC1 protein	Tong et al. (2019)	BBA_01022_Wsc	BBAD15_g1986
Phytochrome (group VIII) BbPhy	Qiu et al. (2014)	BBA_02816	BBAD15_g10862
Cytosolic Cu/Zn superoxide dismutase	Li et al. (2015a)	BBA_02311	BBAD15_4716
Mitochondrial Fe-superoxide dismutase	Li et al. (2015a)	BBA_04317	BBAD15_1608
Cell wall-anchored Cu/Zn superoxide dismutase	Li et al. (2015a)	BBA_01984	BBAD15_5856
Mitochondrial membrane protein (oxidative stress)	He et al. (2014)	*KF827822	BBAD15_7953
Conidial protein	Ying and Feng (2011)	*EF177489	BBAD15_6692
MAPK	Zhang et al. (2009)	BBA_01318	BBAD15_3972
MAPKK (CWI)	Chen et al. (2014b)	BBA_01095	BBAD15_4332
His to asp phosphorelay protein (feeds into Ssk2 / Pbs2 / Hog1)	Wang, Li, Li, and Feng (2014)	BBA_02621	BBAD15_8860
Adenylate cyclase	Wang, Zhou, et al. (2014)	BBA_02117	BBAD15_5718
G-protein-coupled receptor	Ying et al. (2013a)	BBA_00868	BBAD15_8874
Calcineurin catalytic subunit A 1. (Calcium/calmodulin-activated serine/threonine protein phosphatase)	Li, Wang, et al. (2015)	BBA_02703	BBAD15_8778
	Li, Wang, et al. (2015)	BBA_00465	BBAD15_2038
Ras GTPase. Reduced tolerance to cell wall stressors	Xie et al. (2013)	BBA_04387	BBAD15_11654
	Xie et al. (2013)	BBA_04671	BBAD15_9035
	Guan et al. (2015)	BBA_00036	BBAD15_2462
Caleosin, lipid body formation/maintenance.	Fan et al. (2015)	BBA_07305	BBAD15_10151
GPI-anchored glucanosyltransferase	Zhang, Xia, and Keyhani (2011)	*ADP22300	BBAD15_5489
a-1,2-Mannosyltransferase	Wang, Qiu, Cai et al. (2014)	BBA_07003	BBAD15_7081
a-1,2-Mannosyltransferase	Wang, Qiu, Cai et al. (2014)	BBA_00842	BBAD15_4067
Protein O-mannosyltransferase	Wang, Qiu, Chu et al. (2014)	BBA_08768	BBAD15_11536
Mannitol-1-phosphate dehydrogenase	Wang et al. (2012)	*GQ344502	BBAD15_5696
Mannitol‐1‐phosphatedehydrogenase. Mannitol dehydrogenase. Same phenotype as BbMpd	Wang et al. (2012)	*HQ388835	BBAD15_10510
Forkhead transcription factor	Wang et al. (2015)	BBA_08340	BBAD15_6556
Multiprotein-bridging factor-1	Ying et al. (2014)	BBA_01830	BBAD15_10650
Nuclear phosphatase (cytokinesis regulating)	Wang, Liu, et al. (2013)	BBA_07962	BBAD15_2538
Cycle-dependent kinase 1	Qiu et al. (2015)	BBA_02861	BBAD15_6748
Nuclear phosphatase (cyclindependent kinase regulating)	Qiu et al. (2015)	BBA_02861	BBAD15_5866
Nuclear kinase (cyclindependent kinase regulating)	Qiu et al. (2015)	BBA_08543	BBAD15_7273
Hydrophobin 1	Zhang, Xia, Kim, et al. (2011)	*EF452344.2	BBAD15_6903
Hydrophobin 2	Zhang, Xia, Kim, et al. (2011)	*EF520285.2	BBAD15_10483
GPI-anchored cell wall protein	Chen, Zhu, Ying, and Feng (2014a)	BBA_09242	BBAD15_9622
P-type calcium ATPase	Wang, Zhou, Ying, and Feng (2013)	BBA_07889	BBAD15_2615
14-3-3 phosphopeptide binding protein. Vacuolar calcium exchanger (associated with calcineurin).	Hu et al. (2014)	BBA_01399	BBAD15_3895
		BBA_07866	BBAD15_8437
		BBA_01422	BBAD15_3873
		BBA_03873	BBAD15_9947
		BBA_01420	BBAD15_3875
Low conidial tolerance to NaCl	Liu et al. (2015)	BBA_00136	BBAD15_2365
		BBA_08028	BBAD15_9726
*Loci available, but not annotated in the orignal genome record.
References:
Chen, Y., Zhu, J., Ying, S. H., & Feng, M. G. (2014b). Three mitogen-activated protein kinases required for cell wall integrity contribute greatly to biocontrol potential of a fungal entomopathogen. Plos One, 9, e87948. http://dx.doi.org/10.1371/journal.pone.0087948
Wang et al. (2020): Roles of six Hsp70 genes in virulence, cell wall integrity, antioxidant activity and multiple stress tolerance of Beauveria bassiana. Fungal Genet Biol 103437. https://doi.org/10.1016/j.fgb.2020.103437
Liu et. al (2017) Characterization of the Hog1 MAPK pathway in the entomopathogenic fungus Beauveria bassiana. Environ Microbiol 19:1808–1821. https://doi.org/10.1111/1462-2920.13671
Tong et. al (2019) The DUF1996 and WSC domain-containing protein Wsc1I acts as a novel sensor of multiple stress cues in Beauveria bassiana. Cell Microbiol 21:1–13. https://doi.org/10.1111/cmi.13100
Qiu, L., Wang, J. J., Chu, Z. J., Ying, S. H., & Feng, M. G. (2014). Phytochrome controls conidiation in response to red/far-red light and daylight length and regulates multistress tolerance in Beauveria bassiana. Environmental Microbiology, 16, 2316e2328. http:// dx.doi.org/10.1111/1462-2920.12486
Li, F., Shi, H. Q., Ying, S. H., & Feng, M. G. (2015a). Distinct contributions of one Fe- and two Cu/Zn-cofactored superoxide dismutases to antioxidation, UV tolerance and virulence of Beauveria bassiana. Fungal Genetics and Biology, 81, 160e171. http://dx.doi.org/ 10.1016/j.fgb.2014.09.006
He, Z., Zhang, S., Keyhani, N. O., Song, Y., Huang, S., Pei, Y., et al. (2014). A novel mitochondrial membrane protein, Ohmm, limits fungal oxidative stress resistance and virulence in the insect fungal pathogen Beauveria bassiana. Environmental Microbiology. http://dx.doi.org/10.1111/1462e2920.12713
Ying, S. H., & Feng, M. G. (2011). A conidial protein (CP15) of Beauveria bassiana contributes to the conidial tolerance of the entomopathogenic fungus to thermal and oxidative stresses. Applied Microbiology and Biotechnology, 90, 1711e1720. http://dx.doi.org/ 10.1007/s00253-011-3205-7
Zhang, Y. J., Zhao, J. H., Fang, W. G., Zhang, J. Q., Luo, Z. B., Zhang, M., et al. (2009). Mitogen-activated protein kinase hog1 in the entomopathogenic fungus beauveria bassiana regulates environmental stress responses and virulence to insects. Applied and Environmental Microbiology, 75, 3787e3795. http://dx.doi.org/10.1128/Aem.01913-08.
Wang, Z. L., Li, F., Li, C., & Feng, M. G. (2014). Bbssk1, a response regulator required for conidiation, multi-stress tolerance, and virulence of Beauveria bassiana. Applied Microbiology and Biotechnology, 98, 5607e5618. http://dx.doi.org/10.1007/s00253-014-5644-4
Ying, S. H., Feng, M. G., & Keyhani, N. O. (2013). A carbon responsive G-protein coupled receptor modulates broad developmental and genetic networks in the entomopathogenic fungus, Beauveria bassiana. Environmental Microbiology, 15, 2902e2921. http:// dx.doi.org/10.1111/1462-2920.12169
Li, F., Wang, Z. L., Zhang, L. B., Ying, S. H., & Feng, M. G. (2015). The role of three calcineurin subunits and a related transcription factor (Crz1) in conidiation, multistress tolerance and virulence in Beauveria bassiana. Applied Microbiology and Biotechnology, 99, 827e840. http://dx.doi.org/10.1007/s00253-014-6124-6
Xie, X. Q., Guan, Y., Ying, S. H., & Feng, M. G. (2013). Differentiated functions of Ras1 and Ras2 proteins in regulating the germination, growth, conidiation, multi-stress tolerance and virulence of Beauveria bassiana. Environmental Microbiology, 15, 447e462. http:// dx.doi.org/10.1111/j.1462-2920.2012.02871.x
Guan, Y., Wang, D. Y., Ying, S. H., & Feng, M. G. (2015). A novel Ras GTPase (Ras3) regulates conidiation, multi-stress tolerance and virulence by acting upstream of Hog1 signaling pathway in Beauveria bassiana. Fungal Genetics and Biology, 82, 85e94. http:// dx.doi.org/10.1016/j.fgb.2015.07.002
Fan, Y., Ortiz-Urquiza, A., Garrett, T., Pei, Y., & Keyhani, N. O. (2015). Involvement of a caleosin in lipid storage, spore dispersal, and virulence in the entomopathogenic filamentous fungus, Beauveria bassiana. Environmental Microbiology. http://dx.doi.org/10.1111/ 1462e2920.12990
Zhang, S. Z., Xia, Y. X., & Keyhani, N. O. (2011). Contribution of the gas1 gene of the entomopathogenic fungus Beauveria bassiana, encoding a putative glycosylphosphatidylinositolanchored beta-1,3-glucanosyltransferase, to conidial thermotolerance and virulence. Applied and Environmental Microbiology, 77, 2676e2684
Wang, J. J., Qiu, L., Cai, Q., Ying, S. H., & Feng, M. G. (2014). Three alpha-1,2-mannosyltransferases contribute differentially to conidiation, cell wall integrity, multistress tolerance and virulence of Beauveria bassiana. Fungal Genetics and Biology, 70, 1e10. http:// dx.doi.org/10.1016/j.fgb.2014.06.010.
Wang, Z. L., Lu, J. D., & Feng, M. G. (2012). Primary roles of two dehydrogenases in the mannitol metabolism and multi-stress tolerance of entomopathogenic fungus Beauveria bassiana. Environmental Microbiology, 14, 2139e2150. http://dx.doi.org/10.1111/ j.1462-2920.2011.02654.x
Wang, J. J., Qiu, L., Cai, Q., Ying, S. H., & Feng, M. G. (2015). Transcriptional control of fungal cell cycle and cellular events by Fkh2, a forkhead transcription factor in an insect pathogen. Scientific Reports-UK, 5, 10108. http://dx.doi.org/10.1038/srep10108.
Ying, S. H., Ji, X. P., Wang, X. X., Feng, M. G., & Keyhani, N. O. (2014). The transcriptional co-activator multiprotein bridging factor 1 from the fungal insect pathogen, Beauveria bassiana, mediates regulation of hyphal morphogenesis, stress tolerance and virulence. Environmental Microbiology, 16, 1879e1897. http://dx.doi.org/10.1111/1462-2920.12450
Wang, J., Liu, J., Hu, Y., Ying, S. H., & Feng, M. G. (2013). Cytokinesis-required Cdc14 is a signaling hub of asexual development and multi-stress tolerance in Beauveria bassiana. Scientific Reports-UK, 3, 3086. http://dx.doi.org/10.1038/Srep03086.
Qiu, L., Wang, J. J., Ying, S. H., & Feng, M. G. (2015). Wee1 and Cdc25 control morphogenesis, virulence and multistress tolerance of Beauveria bassiana by balancing cell cyclerequired cyclin-dependent kinase 1 activity. Environmental Microbiology, 17, 1119e1133. http://dx.doi.org/10.1111/1462-2920.12530
Zhang, S. Z., Xia, Y. X., Kim, B., & Keyhani, N. O. (2011). Two hydrophobins are involved in fungal spore coat rodlet layer assembly and each play distinct roles in surface interactions, development and pathogenesis in the entomopathogenic fungus, Beauveria bassiana. Molecular Microbiology, 80, 811e826
Chen, Y., Zhu, J., Ying, S. H., & Feng, M. G. (2014a). The GPI-anchored protein Ecm33 is vital for conidiation, cell wall integrity, and multi-stress tolerance of two filamentous entomopathogens but not for virulence. Applied Microbiology and Biotechnology. http:// dx.doi.org/10.1007/s00253-014-5577-y.
Wang, J., Zhou, G., Ying, S. H., & Feng, M. G. (2013). P-type calcium ATPase functions as a core regulator of Beauveria bassiana growth, conidiation and responses to multiple stressful stimuli through cross-talk with signalling networks. Environmental Microbiology, 15, 967e979. http://dx.doi.org/10.1111/1462-2920.12044.
Hu, Y., Wang, J., Ying, S. H., & Feng, M. G. (2014). Five vacuolar Ca2þ exchangers play different roles in calcineurin-dependent Ca2þ/Mn2þ tolerance, multistress responses and virulence of a filamentous entomopathogen. Fungal Genetics and Biology, 73, 12e19. http://dx.doi.org/10.1016/j.fgb.2014.09.005.
Liu, Q., Li, J. G., Ying, S. H., Wang, J. J., Sun, W. L., Tian, C. G., et al. (2015). Unveiling equal importance of two 14-3-3 proteins for morphogenesis, conidiation, stress tolerance and virulence of an insect pathogen. Environmental Microbiology, 17, 1444e1462. http:// dx.doi.org/10.1111/1462-2920.12634

## Sheet: selected for heatmap 
	Contrast: 20% versus 10% glucose
Protein name	gene	day1	day2	day3
Caleosin (BbCal1 )	BBAD15_g10151	-0.566046	-1.31716	-0.971513
Hydrophobin 2 (BbHyd2 )	BBAD15_g10483	-1.00875	-1.64867	-2.30897
Cytosolic Cu/Zn superoxide dismutase (BbSod1 )	BBAD15_g4716	-0.716722	1.33518	-0.0800293
Hydrophobin 1 (BbHyd1 )	BBAD15_g6903	0.519312	1.12974	0.581669
Oxidative homeostasis membrane-protein-mitochondria (Ohmm)	BBAD15_g7953	0.281098	-1.10908	-0.597205
G-protein-coupled receptor (BbGpcr)	BBAD15_g8874	-1.92677	-2.02952	1.71509
Heat shock 70 kDa protein 12B	BBAD15_g4112	0	-2.00389	0
WSC1 protein	BBAD15_g1986	-0.427393	-1.55385	-1.16309
Heat shock 70 kDa protein	BBAD15_g7647	0.288673	-1.18979	-0.261051
